# Supplementary material
Source: publisher site journal article supplement (https://www.dovepress.com/article/194727)
Supplement: Supplementary file 1 [file get_supplementary_file.php]

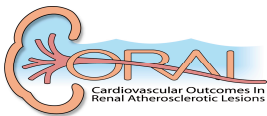

# Current Investigators List 1/17/2014

| Site ID              | Name                                               | Site Principal Investigator with Address                                                                                    | Site Co-Investigators                                                                                                                                 | Site Institutional Review Board Chairman with Address                                                                                                                                    | IRB Approval Date |
|----------------------|----------------------------------------------------|-----------------------------------------------------------------------------------------------------------------------------|-------------------------------------------------------------------------------------------------------------------------------------------------------|------------------------------------------------------------------------------------------------------------------------------------------------------------------------------------------|-------------------|
| <b>United States</b> |                                                    |                                                                                                                             |                                                                                                                                                       |                                                                                                                                                                                          |                   |
| 004*                 | Asheville Cardiology Associates, PA                | William B. Abernethy, MD<br>Asheville Cardiology Associates, PA<br>5 Vanderbilt Park Drive<br>Asheville, NC 28803           | John A. Manley, MD<br>Benjamin Trichon, MD<br>Michael Unks, MD                                                                                        | Hytham Imseis<br>Missions Health Institutional Review Board<br>Mission St. Joseph's Values and Ethics<br>509 Biltmore Avenue<br>Asheville, NN 28801                                      | 5/3/2005          |
| 007*                 | Baylor University Medical Center                   | Andrew Fenves, MD<br>Baylor University Medical Center<br>1420 Viceroy Dr.<br>Dallas, TX 75235                               | Chet Rees, MD                                                                                                                                         | Lawrence R. Schiller, MD<br>Baylor Research Institute<br>Office of Research Subject Protection<br>3434 Live Oak, Suite 125<br>Dallas, Texas 75204                                        | 2/17/2005         |
| 008*                 | Baystate Medical Center                            | Barbara Greco, MD<br>Baystate Medical Center<br>759 Chestnut St.<br>Springfield, MA 01199                                   | James Arcoleo, DO<br>Gregory Braden, MD<br>Gregory Giugliano, MD<br>Ashequl Islam, MD                                                                 | Jessica Young<br>Baystate Medical Center IRB<br>759 Chestnut St<br>Springfield, MA 01199                                                                                                 | 2/28/2005         |
| 009*                 | Berks Cardiologists/St. Joseph Medical Center      | Guy N. Piegari, MD<br>Berks Cardiologists/St. Joseph Medical Center<br>2605 Keiser Blvd.<br>Wyomissing, PA 19610            | Mayank Modi, MD                                                                                                                                       | Katherine Navone<br>St. Joseph Medical Ctr<br>Family & Women's Care<br>145 N 6th St, 2nd floor<br>Community Campus<br>Reading, PA 19603                                                  | 2/15/2005         |
| 010*                 | Beth Israel Deaconess Medical Center               | Mark E. Williams, MD<br>Beth Israel Deaconess Medical Center<br>Renal Unit<br>1 Joslin Place<br>Boston, MA 02215            | Roger Laham, MD                                                                                                                                       | Alan Lisbon<br>Beth Israel Deaconess Medical Center<br>Ctte on Clinical Investigations<br>330 Brookline Ave, Finard 201<br>Boston, MA 02215                                              | 3/9/2005          |
| 022*                 | Fletcher Allen Health Care / University of Vermont | Harold Dauerman, MD<br>Fletcher Allen Health Care / University of Vermont<br>111 Cholchester Avenue<br>Burlington, VT 05401 | F. John Gennari, MD<br>Jeffrey Rimmer, MD<br>Richard Solomon, MD<br>Edward Terrien, MD<br>Wolfgang Weise, MD                                          | Deborah Rubin<br>Fletcher Allen Health Care/University of Vermont<br>Committee on Human Resources<br>Office of Sponsored Programs<br>245 South Park, Suite 900<br>Cholchester , VT 05446 | 3/9/2005          |
| 024*                 | Sacred Heart Medical Center                        | Katherine R. Tuttle, MD<br>Sacred Heart Medical Center<br>104 West 5th Avenue, Suite 350E<br>Spokane, WA 99204              | Radica Alicic, MD<br>Ramu Patakoti, MD, MPH<br>John G. Peterson, MD<br>Rodney D. Raabe, MD<br>Michael Ring, MD<br>Cameron Seibold, MD                 | Robert A. Stier<br>Institutional Review Board-Spokane<br>310 N. Riverpoint Blvd.<br>PO Box 1495<br>Spokane, WA 99210-1495                                                                | 5/24/2005         |
| 025*                 | HeartCare Midwest, S.C.                            | Paul J. Schmidt, MD, FACC<br>HeartCare Midwest, S.C.<br>5405 N. Knoxville Ave<br>Peoria, IL 61614                           | Marco Barzallo, MD<br>Darrel Gumm, MD<br>John Rashid, MD<br>Robert T. Sparrow, MD                                                                     | Frank L. Gold, MD<br>University of Illinois College of Medicine at Peoria<br>Community Institutional Review Board<br>One Illini Drive, Box 1649<br>Peoria, IL 61656-1649                 | 2/15/2005         |
| 032*                 | Inova Fairfax Hospital                             | Alain T. Drooz, MD<br>Inova Fairfax Hospital<br>IHVI Cardiology Research<br>3300 Gallows Road<br>Falls Church, VA 22042     | Minh Dang, MD<br>John T. O'Brien, MD                                                                                                                  | Theodore D. Schultz, JD<br>WIRB®<br>3535 Seventh Avenue, SW<br>Olympia, WA 98508-2029                                                                                                    | 6/9/2005          |
| 036*                 | Lancaster General Hospital                         | John Briguglio, MD<br>Lancaster General Hospital<br>555 North Duke St<br>Lancaster, PA 17603                                | Paul N. Casale, MD<br>Robert E. Gress, MD<br>Matt Livengood, CRNP<br>Carlos Sanchez, MD<br>Leigh S. Shuman, MD<br>Marc Weiner, MD<br>David Winand, MD | James Wilson<br>Lancaster General Hospital<br>555 North Duke Street<br>PO Box 3555<br>Lancaster , PA 17604-3555                                                                          | 2/7/2005          |
| 039*                 | Central Lynchburg General Hospital                 | Daniel Carey, MD<br>Central Lynchburg General Hospital<br>2410 Atherholt Road, PO Box 2749<br>Lynchburg, VA 24501           | Peter O'Brien, MD                                                                                                                                     | Thomas C. Jividen<br>Central Health IRB/Virginia Baptist Hospital<br>1920 Atherholt Rd.<br>Lynchburg, VA 24501                                                                           | 1/21/2005         |
| 043*                 | Mayo Clinic, St. Marys Hospital                    | Stephen C. Textor, MD<br>Mayo Clinic, St. Marys Hospital<br>1216 2nd Street, SW<br>Rochester, MN 55902                      | Gregory Barsness<br>Eddie Greene, MD<br>Rajiv Gulati, MD<br>Verghese Mathew, MD<br>Michael McKusick, MD<br>Sanjay Misra, MD<br>Gustavo Oderich, MD    | Randall K. Pearson, MD<br>Mayo Foundation for Human Research Protection<br>Institutional Review Board<br>201 Building, Room 4-60<br>Rochester, MN 55902                                  | 11/10/2005        |
| 044*                 | McGuire Research Institute                         | Ion Jovin, MD<br>McGuire Research Institute<br>1201 Broad Rock Blvd.<br>Richmond, VA 23249                                  |                                                                                                                                                       | Anthony Minisi<br>McGuire Institutional Review Board<br>McGuire VA Medical Center<br>1201 Broad Rock Blvd<br>Richmond , VA 23249                                                         | 5/31/2005         |
| 045*                 | University of Toledo - HSC                         | Mark W. Burket, MD<br>University of Toledo - HSC<br>3000 Arlington Avenue<br>Dowling Hall 2287<br>Toledo, OH 43614          | William Colyer, MD<br>Christopher J. Cooper, MD<br>Dinkar Kaw, MD<br>Deepak Malhotra<br>Shobha Ratnam, MD                                             | Roland Skeel<br>University of Toledo - HSC<br>Institutional Review Board<br>Center for Creative Instruction, Rm 0106<br>3025 Arlington Avenue<br>Toledo, OH 43614-5804                   | 11/4/2004         |

**Key:** \*site is closed-out; \*\*site close-out visit scheduled

| Site ID | Name                                         | Site Principal Investigator with Address                                                                                                                       | Site Co-Investigators                                                                                                                                                                                                 | Site Institutional Review Board Chairman with Address                                                                                                                                                                         | IRB Approval Date |
|---------|----------------------------------------------|----------------------------------------------------------------------------------------------------------------------------------------------------------------|-----------------------------------------------------------------------------------------------------------------------------------------------------------------------------------------------------------------------|-------------------------------------------------------------------------------------------------------------------------------------------------------------------------------------------------------------------------------|-------------------|
| 047*    | Advocate Medical Group                       | Joseph Marek, MD<br>Advocate Medical Group<br>1901 S. Meyers Road<br>Suite 350<br>Oakbrook Terrace, IL 60181                                                   | John Cahill, MD                                                                                                                                                                                                       | Karla Podrazik<br>Elmhurst Memorial Hospital<br>200 Berteau Avenue<br>Elmhurst, IL 60126                                                                                                                                      | 2/7/2005          |
| 048*    | University of Minnesota                      | Alan T. Hirsch, MD<br>University of Minnesota<br>1300 South Second St.<br>Suite 300<br>Minneapolis, MN 55454                                                   | Yale Wang, MD                                                                                                                                                                                                         | Moir Keane<br>University of Minnesota IRB<br>D528 Mayo Memorial Bldg<br>420 Delaware St SE<br>Minneapolis, MN 55455                                                                                                           | 2/22/2005         |
| 054*    | North Central Heart Institute                | Michael Bacharach, MD<br>North Central Heart Institute<br>4520 West 69th Street<br>Sioux Falls, SD 57108                                                       | Kelly Wasko, CNP<br>Edward Zawada, MD                                                                                                                                                                                 | Carol DeSchepper<br>Avera Institutional Review Board<br>3900 West Avera Drive<br>Sioux Falls, SD 57108-5721                                                                                                                   | 1/27/2005         |
| 055*    | Ochsner Clinic                               | Christopher White, MD<br>Ochsner Clinic<br>1514 Jefferson Highway<br>New Orleans, LA 70121                                                                     | Tyrone Collins, MD, FACC<br>Edward Frohlich, MD<br>James Jenkins, MD<br>Paul McMullan, MD<br>Stephen Ramee, MD<br>John Reilly, MD<br>Hector Ventura, MD                                                               | Joseph L. Breault, MD, ScD, MPH<br>Ochsner Clinic Foundation<br>Institutional Review Board<br>Brent House 514, 1514 Jefferson Highway<br>New Orleans, LA 70121                                                                | 7/12/2005         |
| 059*    | Pima Research / St. Mary's Hospital          | William J. Thomas, MD<br>Pima Research / St. Mary's Hospital<br>445 N. Silverbell Road, Suite 200<br>Tucson, AZ 85745-2627                                     | Amita D. Trivedi, MD                                                                                                                                                                                                  | Yoginder Chitkara<br>Carondelet St. Mary's Hospital<br>1601 W. St. Mary's Rd.<br>Tucson, AZ 85745                                                                                                                             | 9/25/2005         |
| 062*    | Rhode Island Hospital                        | Lance Dworkin, MD<br>Rhode Island Hospital<br>593 Eddy Street<br>Middlehouse 301<br>Providence, RI 02903                                                       | Sun Ahn, MD<br>Gregory J. Dubel, MD<br>Richard Haas, MD<br>Bryan Jay, MD<br>Timothy P. Murphy, MD<br>John O'Bell, MD<br>Ethan Prince, MD<br>Douglas Shemin, MD<br>Gregory M. Soares, MD                               | Penelope Dennehy<br>Rhode Island Hospital<br>593 Eddy Street<br>Providence, RI 02903                                                                                                                                          | 12/8/2004         |
| 065*    | Saint Louis University                       | Donald Jacobs, MD<br>Saint Louis University<br>3635 Vista Ave<br>St. Louis, MO 63110                                                                           | Bahar Bastani, MD<br>Kevin Martin, MD<br>Brian Peterson, MD<br>Catherine Wittgen, MD                                                                                                                                  | Raymond Tait, PhD<br>Saint Louis University<br>Biomedical Institutional Review Board<br>3556 Caroline St.<br>St. Louis, MO 63104                                                                                              | 2/7/2006          |
| 067*    | Shands Hospital at the University of Florida | R. David Anderson, MD<br>Shands Hospital at the University of Florida<br>1600 SW Archer Road<br>Gainesville, FL 32610                                          | Anthony Bavry, MD, MPH<br>Peter Nelson, MD<br>Karen Smith, MD                                                                                                                                                         | R. Peter Iafate<br>University of Florida<br>Health Center Institutional Review Board<br>P.O. Box 100173<br>Gainesville, FL 32610-0173                                                                                         | 5/16/2005         |
| 069*    | Prairie Education Research                   | Jeffrey Goldstein, MD<br>Prairie Education Research<br>619 E. Mason<br>Springfield, IL 62701                                                                   | John Gill, MD<br>Nilesh Goswami, MD<br>Richard E. Katholi, MD<br>Raghu Kolluri, MD<br>Gregory Mishkel, MD                                                                                                             | Mark A. Tatum<br>326 North Seventh St., Suite 218<br>Springfield, IL 62701                                                                                                                                                    | 9/13/2005         |
| 076*    | University of Chicago Hospitals              | Sandeep Nathan, MD<br>University of Chicago Hospitals<br>5841 S. Maryland Ave. MC5076 M532<br>Chicago, IL 60637                                                | Neeraj Jolly, MD<br>Rupa Mehta, MD<br>Atman Shah, MD                                                                                                                                                                  | Jonathan Moss<br>University of Chicago Hospitals<br>5841 S. Maryland Avenue<br>Chicago, IL 60637                                                                                                                              | 6/7/2005          |
| 078*    | University of Miami                          | Gabriel Contreras, MD, MPH<br>University of Miami<br>Division of Nephrology & Hypertension<br>1120 NW 14th Street<br>CRB809 (R-126)<br>Miami, FL 33136         | Eduardo deMarchena, MD                                                                                                                                                                                                | Theodore D. Schultz, JD<br>WIRB®<br>3535 Seventh Avenue, SW<br>Olympia, WA 98508-2029                                                                                                                                         | 9/1/2005          |
| 080*    | University of Michigan Medical Center        | David Williams, MD<br>University of Michigan Medical Center<br>1500 E. Medical Center Dr., B1D530 UH<br>Ann Arbor, MI 48109                                    | Stanley Chetcuti, MD<br>Kyung Cho, MD<br>James B. Froehlich, MD<br>Joseph Gemmete, MD<br>P. Michael Grossman, MD<br>Venkataramu Krishnamurthy, MD<br>John Rectenwald, MD<br>James Shields, MD<br>Thomas Wakefield, MD | Michael Geisser<br>University of Michigan Medical School<br>Institutional Review Board for Human Subject Research<br>517 W. Williams Street<br>Ann Arbor, MI 48103-4943                                                       | 2/24/2005         |
| 082*    | University of North Carolina At Chapel Hill  | George (Rick) A. Stouffer, MD<br>University of North Carolina At Chapel Hill<br>160 Dental Circle<br>6th Floor, Burnett-Womack 6016-D<br>Chapel Hill, NC 27599 | Robert Dixon, MD<br>Alan Hinderliter, MD<br>Matt Mauro, MD                                                                                                                                                            | Stephen A. Bernard<br>University of North Carolina At Chapel Hill<br>The School of Medicine<br>Committee on the Protection of the Rights of Human Subjects<br>CB# 7097, Medical School Bldg. 52<br>Chapel Hill, NC 27599-7097 | 8/3/2005          |

| Site ID | Name                                                      | Site Principal Investigator with Address                                                                                                                                                                                           | Site Co-Investigators                                                                                                                    | Site Institutional Review Board Chairman with Address                                                                                                                  | IRB Approval Date |
|---------|-----------------------------------------------------------|------------------------------------------------------------------------------------------------------------------------------------------------------------------------------------------------------------------------------------|------------------------------------------------------------------------------------------------------------------------------------------|------------------------------------------------------------------------------------------------------------------------------------------------------------------------|-------------------|
| 083*    | University of Oklahoma Health Sciences Center             | Jose Exaire, MD<br>University of Oklahoma Health Sciences Center<br>920 Stanton L Young WP3010<br>Oklahoma City, OK 73104                                                                                                          | Jose Exaire, MD<br>Lukas Haragsim, MD<br>Thomas Hennebry, MD                                                                             | Karen Beckman<br>University of Oklahoma Health Sciences Center<br>Institutional Review Board<br>Library Room 121<br>PO Box 26901<br>Oklahoma City, OK 73190-3046       | 10/10/2005        |
| 084*    | University of Pennsylvania Health System                  | Michael R. Rudnick, MD<br>University of Pennsylvania Health System<br>Renal Electrolyte and Hypertension Division<br>Presbyterian Medical Center<br>240 Medical Office Building<br>39th & Market Streets<br>Philadelphia, PA 19104 | Michael Soulen, MD<br>Arthur P. Topoulos, MD                                                                                             | Joseph Sherwin<br>University of Pennsylvania Health System<br>The Office of Regulatory Affairs<br>133 S. 36th Street Mezzanine Level<br>Philadelphia, PA 19104-3246    | 5/16/2005         |
| 085*    | University of Texas Health Science Center at San Antonio  | Alexander Shepherd, MD, PhD<br>University of Texas Health Science Center at San Antonio<br>7703 Floyd Curl Drive<br>5.4 MCD<br>San Antonio, TX 78229-3900                                                                          | Steven Bailey, MD<br>Jorge Lopera, MD<br>Rajeev Suri, MD                                                                                 | Wayne P. Pierson, PhD<br>University of Texas Health Science Center at San Antonio<br>Mail Code 7830<br>7703 Floyd Curl Drive<br>San Antonio, TX 78229-3900             | 11/18/2005        |
| 087*    | University of Virginia Health System                      | John Angle, MD<br>University of Virginia Health System<br>Surgical Therapeutic Advancement Center<br>PO Box 801370<br>Hospital Drive<br>Charlottesville, VA 22908                                                                  | Mitchell Rosner, MD                                                                                                                      | Karen J. Schenzer, MD<br>University of Virginia Health System<br>Human Investigation Committee<br>PO Box 800483<br>University of Virginia<br>Charlottesville, VA 22908 | 8/29/2005         |
| 093*    | University of Iowa HealthCare                             | James D. Rossen, MD<br>University of Iowa HealthCare<br>200 Hawkins Dr<br>Iowa City, IA 52242                                                                                                                                      | Theresa Brennan, MD<br>Elaine Demetroulis, MD<br>Bradley Dixon, MD<br>Phillip Horwitz, MD<br>William J. Lawton, MD<br>Douglas Somers, MD | Andrew Bertolatus<br>University of Iowa HealthCare<br>340 Medicine Administration Building<br>Iowa City, IA 52242-1101                                                 | 6/12/2005         |
| 099*    | Piedmont Hospital                                         | Vivek Rajagopal, MD<br>Piedmont Hospital<br>Piedmont Heart Institute<br>275 Collier Rd., Suite 300<br>Atlanta, GA 30309                                                                                                            | William Blincoe, MD<br>Charles Brown, MD<br>Harold Carlson, MD                                                                           | Charles Henderson<br>Piedmont Hospital<br>95 Collier Rd, NW, Suite 5015<br>Atlanta, GA 30309                                                                           | 2/8/2005          |
| 100*    | Cardiac & Vascular Research Center of Northern Michigan   | Louis A. Cannon, MD<br>Cardiac & Vascular Research Center of Northern Michigan<br>560 W. Mitchell St. Suite 480<br>Petoskey, MI 49770                                                                                              | Harold J. Willens, MD                                                                                                                    | Theodore D. Schultz, JD<br>WIRB@<br>3535 Seventh Avenue, SW<br>Olympia, WA 98508-2029                                                                                  | 1/19/2006         |
| 101*    | LeBauer Cardiovascular / Moses Cone Hospital              | Michael Cooper, MD<br>LeBauer Cardiovascular / Moses Cone Hospital<br>1126 North Church St. Suite 300<br>Greensboro, NC 27401                                                                                                      | Joseph Coladonato, MD<br>James Deterding, MD<br>Kellie Goldsborough, MD<br>David Zeyfang, PA-C                                           | Charles H. Wilson<br>Moses Cone Health System<br>Institutional Review Board<br>1200 N. Elm Street<br>Greensboro, NC 27401-1020                                         | 2/8/2005          |
| 103*    | University of Texas Southwestern Medical Center at Dallas | Amit Khera, MD<br>University of Texas Southwestern Medical Center at Dallas<br>Cardiology Clinical Research and Education<br>5323 Harry Hines Blvd.<br>MC 8830<br>Dallas, TX 75390-8830                                            | Subash Banerjee, MD<br>Emmanouil Brilakis, MD<br>Shellie Josephs, MD<br>Jorge Lopez, MD<br>Ramesh Saxena, MD, PhD<br>Clayton Trimmer, DO | David R. Kemp, MD, PhD<br>Southwestern Medical Center<br>Institutional Review Board 1<br>5323 Harry Hines Boulevard, CI 206<br>Dallas, TX 75390-8843                   | 1/24/2006         |
| 104*    | Presbyterian Hospital / Presbyterian Heart Group          | Michael Harding, MD<br>Presbyterian Hospital / Presbyterian Heart Group<br>201 Cedar, SE Suite 7600<br>Albuquerque, NM 87106                                                                                                       | Kirby Gabrys, MD                                                                                                                         | Richard Giudice<br>Presbyterian Healthcare Services<br>PO Box 26666<br>1100 Central SE<br>Albuquerque, NM 87125-6666                                                   | 2/22/2005         |
| 106*    | Hope Heart Institute                                      | James Leggett, MD<br>Hope Heart Institute<br>1135 116th Avenue NE, Suite 600<br>Bellevue, WA 98004                                                                                                                                 | Philip King, MD<br>Mark P. Ombrellaro, MD                                                                                                | Neal Perlmutter<br>Overlake Hospital Medical Center<br>1035 116th Avenue NE<br>Bellevue, WA 98004                                                                      | 3/11/2005         |
| 110*    | Wellmont Holston Valley Medical Center                    | D. Christopher Metzger, MD<br>Wellmont Holston Valley Medical Center<br>130 W. Ravine<br>Kingsport, TN 37660                                                                                                                       | Steven Butler, MD<br>Marc W. Mayhew, MD<br>Pabitra Saha, MD<br>Duc Vu, MD                                                                | C. Robert Bice<br>Wellmont Holston Valley Medical Center<br>135 West Ravine Road<br>Suite 2C<br>Kingsport, TN 37660                                                    | 3/8/2005          |
| 114*    | Doylestown Hospital                                       | Joseph McGarvey, MD<br>Doylestown Hospital<br>595 West State Street<br>Doylestown, PA 18901                                                                                                                                        | Aaron Diodato, DO<br>Daniel Lin, MD<br>Mitch Vernace, MD                                                                                 | Lawrence Brilliant<br>595 West State Street<br>Doylestown, PA 18901                                                                                                    | 2/15/2005         |
| 117*    | St. Luke's Medical Center                                 | Robert A. Beres, MD<br>St. Luke's Medical Center<br>2900 W Oklahoma Ave<br>PO Box 2901<br>Milwaukee, WI 53201-2901                                                                                                                 | Daniel Bloomgarden, MD, PhD<br>Amy Doherty, PA-C<br>David Olson, MD<br>Jenny L. Smith, PA-C                                              | William Pao<br>Aurora Health Care IRB<br>945 N. 12th St.<br>PO Box 342 W310<br>Milwaukee, WI 53201-0342                                                                | 5/13/2005         |

| Site ID | Name                                                         | Site Principal Investigator with Address                                                                                                                                                   | Site Co-Investigators                                                                                        | Site Institutional Review Board Chairman with Address                                                                                                                                                    | IRB Approval Date |
|---------|--------------------------------------------------------------|--------------------------------------------------------------------------------------------------------------------------------------------------------------------------------------------|--------------------------------------------------------------------------------------------------------------|----------------------------------------------------------------------------------------------------------------------------------------------------------------------------------------------------------|-------------------|
| 119*    | Stanford University Medical Center                           | Jason Lee, MD<br>Stanford University Medical Center<br>300 Pasteur Dr, Suite H3600<br>Palo Alto, CA 94305                                                                                  | Glenn Chertow, MD<br>William Kuo, MD                                                                         | David D. Oakes<br>Stanford University Medical Center<br>Administrative Panel for Human Subjects in<br>Medical Research<br>1215 Welch Rd., Modular A<br>Stanford, CA 94305-5401                           | 9/27/2005         |
| 121*    | Wake Forest University/Baptist Medical Center                | Matthew S. Edwards, MD<br>Wake Forest University/Baptist Medical Center<br>Department of General Surgery<br>Section on Vascular Surgery<br>Medical Center Blvd.<br>Winston-Salem, NC 27157 | Randolph Geary, MD<br>Pavel Levy, MD                                                                         | Margaret Harper<br>Medical Center Blvd<br>Winston-Salem, NC 27157                                                                                                                                        | 11/13/2007        |
| 122*    | Holy Name Hospital                                           | John H. Rundback, MD<br>Holy Name Hospital<br>Institute for Clinical Research<br>718 Teaneck Road<br>Teaneck, NJ 07666                                                                     | Jacqueline Brunetti, MD<br>David Levin, MD                                                                   | Theodore D. Schultz, JD<br>WIRB®<br>3535 Seventh Avenue, SW<br>Olympia, WA 98508-2029                                                                                                                    | 11/23/2005        |
| 123*    | Infinity Clinical Research                                   | Juan Pastor, MD<br>Infinity Clinical Research<br>1150 N 35th Avenue, Suite 605<br>Hollywood, FL 33021                                                                                      | James Reich, MD<br>Ann Robblee, PA-C                                                                         | Wayne G. Riskin, MD, FACP<br>Memorial Healthcare System<br>Institutional Review Board<br>3501 Johnson Street<br>Hollywood, FL 33921                                                                      | 4/9/2007          |
| 126*    | New York Mount Sinai Medical Center                          | Jeffrey Olin, DO<br>New York Mount Sinai Medical Center<br>Zena and Michael A. Wiener<br>Cardiovascular Institute<br>One Gustave L. Levy Place<br>New York, NY 10029                       | Robert Lookstein, MD                                                                                         | Jeff Silverstein<br>One Gustave L. Levy Place<br>Box 1075<br>New York, NY 10029-6754                                                                                                                     | 12/1/2005         |
| 129*    | University of California, San Francisco VA Medical Center    | Joseph H. Rapp, MD<br>University of California, San Francisco VA Medical Center<br>4150 Clement St.<br>Mail Stop 112G<br>San Francisco, CA 94117                                           | Rajiv Sawhney, MD<br>Kendrick Shunk, MD<br>Jeffrey Zimmet, MD                                                | Susan Sniderman<br>Committee on Human Research (CHR),<br>Office of Research<br>University of California, San Francisco VA Medical Center<br>3333 California Street, Suite 315<br>San Francisco, CA 94118 | 3/29/2006         |
| 130*    | St. Joseph Hospital                                          | Mahmood K. Razavi, MD<br>St. Joseph Hospital<br>1100 Stewart Drive<br>Orange, CA 92868                                                                                                     | D. P. Flanigan, MD<br>Amer Jabara, MD<br>Donald J. Mahon, MD<br>Kurt L. Openshaw, MD                         | Warren Johnston, MD<br>St. Joseph Hospital<br>Institutional Review Board<br>110 West Stewart Drive<br>Orange, CA 92868                                                                                   | 11/28/2005        |
| 135*    | Wayne State University                                       | John Flack, MD, MPH<br>Wayne State University<br>4201 St. Antoine,<br>University Health Center, Suite 2E-UHC<br>Detroit, MI 48202                                                          | Mahir Elder, MD<br>Brian Ference, MD<br>Jeff Rubin, MD<br>Theodore L. Schreiber, MD<br>James Sondheimer, MD  | Manuel Tancer<br>HIC Office<br>101 East Alexandrine Building<br>Detroit, MI 48201                                                                                                                        | 5/4/2006          |
| 138*    | St. Joseph Mercy Hospital/Michigan Heart                     | Herbert D. Aronow, MD, MPH<br>St. Joseph Mercy Hospital/Michigan Heart<br>5323 Elliott Drive, Suite 203<br>Ypsilanti, MI 48197                                                             | Paul Berkowitz, MD<br>Jennifer Fischer, NP<br>Vidooshi Maru, MD<br>Mansoor A. Qureshi, MD<br>Ahmed Rehan, MD | James Mitchiner<br>Emergency Medicine<br>5301 E Huron River Drive<br>PO Box 995<br>Ann Arbor, MI 48106                                                                                                   | 6/6/2006          |
| 143*    | Greenville Hospital System                                   | Bruce Gray, DO<br>Greenville Hospital System<br>Vascular Health Alliance<br>200 C Patewood Drive, Suite 300<br>Greenville, SC 29615                                                        | Christopher G. Carsten III, MD<br>Eugene M. Langan III, MD<br>Thomas L. Oliver, MD<br>John W. York, MD       | T. Fleming Mattox<br>Greenville Hospital System<br>University Medical Center<br>900 W. Faris Rd.<br>Greenville, SC 29605-5601                                                                            | 9/14/2006         |
| 149*    | University of Louisville                                     | Sohail Ikram, MD<br>University of Louisville<br>Department of Medicine<br>530 S. Jackson St.<br>Ambulatory Care Bldg., 3rd Floor<br>Louisville, KY 40202                                   | Rosemary Ouseph, MD                                                                                          | Laura Clark, MD<br>Human Subjects Protection Program<br>Office<br>University of Louisville<br>MedCenter One, Suite 200<br>501 E. Broadway<br>Louisville, KY 40202-1798                                   | 11/9/2006         |
| 150*    | Washington Hospital Center                                   | Nelson Bernardo, MD<br>Washington Hospital Center<br>110 Irving St. NW<br>Washington, DC 20010                                                                                             | Lowell Satler, MD<br>Judith H. Veis, MD                                                                      | Charles Mackay<br>Office of Research Integrity<br>Medstar Research Institute<br>6495 New Hampshire Avenue, Suite 200<br>Hyattsville, MD 20783                                                            | 10/2/2006         |
| 153*    | Scott & White Hospital                                       | Mohanram Narayanan, MD<br>Scott & White Hospital<br>2401 S. 31st Street, Bldg. 26<br>Temple, TX 76508                                                                                      | Timothy A. Mixon, MD                                                                                         | Not Released By Site<br>Scott & White Institutional Review Board<br>2401 S. 31st St., Alexander Building<br>Temple, TX 76508                                                                             | 3/8/2007          |
| 154*    | Keck Medical Center of the University of Southern California | Fred A. Weaver, MD, MMM<br>Keck Medical Center of the University of Southern California<br>Healthcare Consultation Center<br>1520 San Pablo St., Suite # 4300<br>Los Angeles, CA 90033     | Leonardo Clavijo, MD<br>Ray Matthews, MD<br>Mitra K. Nadim, MD<br>Vincent L. Rowe, MD                        | Darcy Spicer<br>Institutional Review Board<br>LAC/USC Medical Center, Interns<br>Residence Dorm #425<br>2020 Zonal Avenue<br>Los Angeles, CA 90033                                                       | 2/16/2007         |



| Site ID | Name                                         | Site Principal Investigator with Address                                                                                                                   | Site Co-Investigators                                                                               | Site Institutional Review Board Chairman with Address                                                                                                                      | IRB Approval Date |
|---------|----------------------------------------------|------------------------------------------------------------------------------------------------------------------------------------------------------------|-----------------------------------------------------------------------------------------------------|----------------------------------------------------------------------------------------------------------------------------------------------------------------------------|-------------------|
| 159*    | West LA VA Medical Center                    | Ramin Ebrahimi, MD<br>West LA VA Medical Center<br>11301 Wilshire Blvd.<br>Los Angeles, CA 90073                                                           | Arnold J. Felsenfeld, MD                                                                            | Michael Littner<br>Veteran Affairs Greater Los Angeles<br>Healthcare System IRB<br>Research and Development Office<br>Building 114, Mail Code-151<br>Los Angeles, CA 90073 | 5/10/2007         |
| 167*    | New York VA Medical Center                   | David S. Goldfarb, MD<br>New York VA Medical Center<br>423 E. 23rd St.<br>Mailcode 111<br>New York, NY 10010                                               | Jeffrey Lorin, MD                                                                                   | Norton Spritz<br>New York Harbor Health Care System<br>(NYVAMC)<br>423 E 23rd Street<br>New York, NY 10010                                                                 | 12/3/2007         |
| 168*    | Dallas VA Medical Center                     | Subhash Banerjee, MD<br>Dallas VA Medical Center<br>Health Care System<br>4500 S. Lancaster Rd.<br>CRU 8C<br>Dallas, TX 75216                              | Emmanouil Brilakis, MD, PhD<br>Robert Cronin, MD                                                    | Rhonda Souza<br>VA North Texas Health Care System<br>Dallas VAMC IRB<br>4500 S. Lancaster Road (151)<br>Dallas, TX 75216                                                   | 12/17/2007        |
| 174*    | Hypertension & Renal Research Group          | Theodore S. Herman, MD<br>Hypertension & Renal Research Group<br>220 Red Tail<br>Orchard Park, NY 14127                                                    | Arundathi Namassivaya, MD                                                                           | Michael Grisanti<br>Catholic Health System IRB<br>2157 Main St.<br>Buffalo, NY 14214                                                                                       | 7/27/2007         |
| 178*    | University Hospitals / Case Medical Center   | Michael Cunningham, MD<br>University Hospitals / Case Medical Center<br>11100 Euclid Ave.<br>Cleveland, OH 44106                                           | Shyam Bhakta, MD<br>Teresa Carman, MD<br>Marco Costa, MD<br>James Fang, MD<br>Mahboob Rahman, MD    | Not Disclosed<br>11100 Euclid Avenue<br>Office of Institutional Review<br>Lakeside 1400<br>MS LKS 7061<br>Cleveland, OH 44106                                              | 1/17/2008         |
| 179*    | Ann Arbor VA Health System                   | Venkataramu Krishnamurthy, MD<br>Ann Arbor VA Health System<br>2215 Fuller Rd.<br>Radiology Services (114)<br>Ann Arbor, MI 48105                          | Claire Duvernoy, MD<br>Peter Henke, MD<br>John Rectenwald, MD<br>Adam Tremblay, MD                  | Carol Kauffman<br>Ann Arbor Veteran's Affairs Health System<br>Radiology Services 114<br>2215 Fuller Road<br>Ann Arbor, MI 48105-2303                                      | 11/8/2007         |
| 180*    | Mercy Gilbert Medical Center                 | Georges Nseir, MD<br>Mercy Gilbert Medical Center<br>CV research at Mercy Gilbert Medical Center<br>725 S. Dobson Rd., Ste. 100<br>Chandler, AZ 85224-5680 | Nabil Dib, MD, MSc. FACC<br>Ayman Jamal, MD<br>Bhupinder Singh, MD<br>Lyndon Xavier, MD             | Brian R. Tiffany, MD, PhD<br>CHW East Valley Regional Institutional<br>Review Board<br>475 S. Dobson Road<br>Chandler, AZ 85224                                            | 9/24/2007         |
| 181*    | Bethesda North Hospital                      | Joel Reginelli, MD, FACC<br>Bethesda North Hospital<br>c/o Cardiac Research<br>10500 Montgomery Road<br>Cincinnati, OH 45242                               | Stephen Lewis, MD                                                                                   | Not Disclosed<br>TriHealth IRB<br>C/O Good Samaritan Hospital<br>375 Dixmyth Avenue<br>Cincinnati, OH 45220                                                                | 10/10/2007        |
| 183*    | United Regional Health Care System           | Andre Desire, MD<br>United Regional Health Care System<br>111709 10th St., Suite B<br>Wichita Falls, TX 76301                                              | Soe-Ni Kong, MD<br>Bruce Palmer, MD<br>Ashvin Patel, MD<br>Sriram Sudarshan, MD<br>Venkat Thota, MD | WIRB<br>3535 Seventh Ave, SW<br>Olympia, WA 98502-5010                                                                                                                     | 1/3/2008          |
| 187*    | University of Cincinnati Medical Center      | Mohamed A. Effat, MD<br>University of Cincinnati Medical Center<br>231 Albert Sabin Way, ML 0542<br>Cincinnati, OH 45267-0542                              | Imran Arif, MD<br>Tarek Helmy, MD, FACC<br>Garesh Yadlapalli, MD                                    | Michael Linke<br>University of Cincinnati IRB<br>G-08 Wherry Hall, ML0567<br>Eden Avenue and Albert Sabin Way<br>Cincinnati, OH 45267-0567                                 | 1/16/2008         |
| 191*    | Medical University of South Carolina         | John Selby, MD<br>Medical University of South Carolina<br>169 Ashley Ave., MSC 322<br>Charleston, SC 29425                                                 | Michael Guimaraes, MD<br>Michael E. Ullian, MD                                                      | Patricia Arford, PhD, RN<br>Medical University of South Carolina<br>165 Cannon St., Rm 501<br>PO Box 250857<br>Charleston, SC 29425                                        | 12/4/2007         |
| 193*    | Summa Health System Hospital                 | Joseph Pietrolungo, DO<br>Summa Health System Hospital<br>525 East Market St.<br>Akron, OH 44309                                                           | Christopher Boshkos, MD                                                                             | Kirk Stiffler<br>Summa Health System IRB<br>41 Arch St.<br>Suite 508<br>Akron, OH 44304                                                                                    | 11/19/2007        |
| 199*    | Essentia Institute of Rural Health           | Christopher Bunch, MD<br>Essentia Institute of Rural Health<br>403 E. 3rd St.<br>Duluth, MN 55805                                                          | Christopher DeMaiores, MD                                                                           | Charles Gessert, MD, MPH<br>SMDC Health System<br>400 E. 3rd St.<br>Duluth, MN 55805                                                                                       | 1/8/2008          |
| 200*    | CAMC Health Education and Research Institute | Aravinda Nanjundappa, MD<br>CAMC Health Education and Research Institute<br>3100 MacCorkle Ave., Suite 806<br>Charleston, WV 25304                         | Asif Rahman, MD<br>Patrick Stone, MD                                                                | John Linton<br>CAMC/WVA IRB<br>3110 MacCorkle Ave., SE<br>Room 3284<br>Charleston, WV 25304                                                                                | 2/28/2008         |
| 201*    | South Denver Cardiology Associates           | Joseph Burchenal, MD<br>South Denver Cardiology Associates<br>1000 South Park Drive<br>Littleton, CO 80120                                                 | Mark Dillingham, MD                                                                                 | Theodore D. Schultz, JD<br>WIRB@<br>3535 Seventh Avenue, SW<br>Olympia, WA 98508-2029                                                                                      | 9/11/2008         |
| 205*    | Maine Medical Center                         | Mark G. Parker, MD<br>Maine Medical Center<br>22 Bramhall Street<br>Portland, ME 04102                                                                     | Stuart Abramson, MD<br>David W. Butzel, MD<br>Paul Harrod-Kim, MD                                   | Kenneth Ault<br>81 Research Drive<br>Scarborough, ME 04074                                                                                                                 | 1/29/2008         |

| Site ID | Name                                                    | Site Principal Investigator with Address                                                                                                                                            | Site Co-Investigators                                                                                                                                   | Site Institutional Review Board Chairman with Address                                                                                                                                                                                 | IRB Approval Date |
|---------|---------------------------------------------------------|-------------------------------------------------------------------------------------------------------------------------------------------------------------------------------------|---------------------------------------------------------------------------------------------------------------------------------------------------------|---------------------------------------------------------------------------------------------------------------------------------------------------------------------------------------------------------------------------------------|-------------------|
| 206*    | McLaren Regional Medical Center                         | Robert Molnar, MD<br>McLaren Regional Medical Center<br>401 S. Ballenger Highway<br>Flint, MI 48532                                                                                 | Russell Becker, DO<br>Carlo Dall'Olmo, MD<br>Gregory Fortin, MD<br>Allan Ippolito, MD<br>Wayne Kinning, MD<br>Nitin Malhotra, MD<br>John McIluff, MD    | Harlan Verrill<br>McLaren Regional Medical Center<br>Institutional Review Board<br>401 South Bellenger Highway<br>Flint, MI 48532-3685                                                                                                | 3/21/2008         |
| 211*    | Providence Everett Medical Center for Clinical Research | Michael Duong, MD<br>Providence Everett Medical Center for Clinical Research<br>Western Washington Medical Group<br>12728 Bothell-Everett Highway<br>Suite 200<br>Everett, WA 98206 | Mark E. Gunning, MD<br>Oliver Ochs, MD<br>Mark Papenhausen, MD<br>Mohammed Qurashi, MD                                                                  | Theodore D. Schultz, JD<br>WIRB®<br>3535 Seventh Avenue, SW<br>Olympia, WA 98508-2029                                                                                                                                                 | 5/21/2008         |
| 212*    | Gundersen Clinic, LTD.                                  | Fadi Z. Ghandour, MD<br>Gundersen Clinic, LTD.<br>1836 South Ave<br>Mailstop C03-006B<br>La Crosse, WI 54601                                                                        | Larry Fundell, MD<br>Lincoln H. Gundersen, MD<br>Leah Metz, MD<br>Margaret Myhre, NP<br>Balaji Srinivasan, MD<br>Kumari Usha, MD<br>Kurt Ziegelbein, MD | Bernard Hammes<br>1836 South Ave<br>La Crosse, WI 54601                                                                                                                                                                               | 5/28/2008         |
| 215*    | The Ohio State University Medical Center                | Quinn Capers, MD<br>The Ohio State University Medical Center<br>410 W. 10th Avenue<br>Columbus, OH 43210                                                                            | Veronica Franco, MD<br>Ernest Mazzaferri, M.D.                                                                                                          | Karla Zadnick, PhD<br>The Ohio State University Medical Center<br>Biomedical Research Institutional Review Board<br>Office of Responsible Research Practices<br>300 Research Foundation<br>1960 Kenny Road<br>Columbus, OH 43210-1063 | 12/5/2008         |
| 216*    | Geisinger Health System And Medical Center              | James Elmore, MD<br>Geisinger Health System And Medical Center<br>100 N. Academy Ave.<br>Danville, PA 17822                                                                         | David Franklin, MD<br>Robert P. Garvin, MD<br>John L. Gray, MD<br>Taher Yahya, MD                                                                       | Nancy Moody, JD, MA<br>Geisinger Health System And Medical Center<br>Institutional Review Board<br>M.C. 26-03<br>100 North Academy Avenue<br>Danville, PA 17822                                                                       | 12/17/2008        |
| 218*    | Good Samaritan Regional Medical Center                  | Edward Toggart, MD<br>Good Samaritan Regional Medical Center<br>Cardiology Department<br>3600 NW Samaritan Drive, Suite E-350<br>Corvallis, OR 97330                                | Jefferson A. Hamlin, MD<br>Vyacheslav Melnikov, MD<br>John Molitor, MD<br>Ohnn Nahm, MD<br>Ihab Wahba, MD                                               | Peter Nelson<br>Good Samaritan Regional Medical Center<br>815 NW 9th St., Ste. 203A<br>Corvallis, OR 97330                                                                                                                            | 9/18/2008         |
| 220*    | Temple University Hospital                              | Riyaz Bashir, MD<br>Temple University Hospital<br>3401 N. Broad Street (9 PP)<br>Philadelphia, PA 19140                                                                             | Michael A. Brown, MD<br>David M. Fiss, MD<br>Jesse Goldman, MD                                                                                          | Michael Jacobs<br>3400 North Broad Street (509-00)<br><br>Philadelphia, PA 19140                                                                                                                                                      | 12/11/2008        |
| 222*    | Four Rivers Clinical Research                           | Shaukat Ali, MD<br>Four Rivers Clinical Research<br>225 Medical Center Drive, Suite 305<br>Paducah, KY 42003                                                                        | Timothy Ranval, MD                                                                                                                                      | Theodore D. Schultz, JD<br>WIRB®<br>3535 Seventh Avenue, SW<br>Olympia, WA 98508-2029                                                                                                                                                 | 7/23/2009         |

| Site ID                      | Name                                                | Site Principal Investigator with Address                                                                                                                                       | Site Co-Investigators                                                                                        | Site Institutional Review Board Chairman with Address                                                                                                                                   | IRB Approval Date |
|------------------------------|-----------------------------------------------------|--------------------------------------------------------------------------------------------------------------------------------------------------------------------------------|--------------------------------------------------------------------------------------------------------------|-----------------------------------------------------------------------------------------------------------------------------------------------------------------------------------------|-------------------|
| <b>Outside United States</b> |                                                     |                                                                                                                                                                                |                                                                                                              |                                                                                                                                                                                         |                   |
| 049*                         | McGill University Health Centre                     | Luc Bilodeau, MD<br>McGill University Health Centre<br>Cardiology Department<br>687 Avenue des Pins Ouest, Room M4.74<br>Montreal, Quebec H3A 1A1                              | Pierre Larochelle, MD                                                                                        | Conrad Pelletier<br>Montreal Heart Institute<br>5000 Belanger St.<br>Montreal, Quebec H1T 1C8                                                                                           | 11/15/2005        |
| 097*                         | Vancouver Hospital                                  | David Wood, MD<br>Vancouver Hospital<br>Diamond Health Care Centre<br>2775 Laurel St., Room 9105<br>Vancouver, B.C. Canada V5Z 1M9                                             | Anthony Fung, MD<br>Krishnan Ramanathan, MD<br>Donald Ricci, MD<br>Jacqueline Saw, MD<br>Nadia Zalunardo, MD | Gail Bellward<br>The University of British Columbia<br>Room 210-828 West 10th Ave<br>Vancouver, British Columbia V6T2G3                                                                 | 9/19/2005         |
| 132*                         | Sunnybrook & Women's College Health Sciences Centre | Sheldon Tobe, MD<br>Sunnybrook & Women's College Health Sciences Centre<br>C504 2075 Bayview Avenue<br>Toronto, Ontario Canada M4N 3M5                                         | Ganesan Annamalai, MD<br>Elizabeth David, MD, FRCPC<br>Robyn Pugash, MD, FRCPC                               | Philip Hebert<br>Family Practice Room A102<br>Sunnybrook & Women's College Health Sciences Centre<br>University of Toronto<br>2075 Bayview Avenue<br>Toronto, Ontario Canada M4N 3M5    | 5/29/2006         |
| 139*                         | Foothills Medical Center                            | Ronak S. Kanani, MD<br>Foothills Medical Center<br>1403 - 29 Street NW<br>Calgary, Alberta Canada T2N 2T9                                                                      | Nairne Scott-Douglas, MD, PhD                                                                                | Christopher J. Doig, MD<br>Foothills Medical Center<br>Office of Medical Ethics<br>Heritage Medical Research Building/Rm 93<br>3330 Hospital Drive N.W.<br>Calgary, Canada T2N 4N1      | 5/12/2006         |
| 148*                         | Auckland City Hospital                              | Andrew Holden, MD<br>Auckland City Hospital<br>Park Road, Grafton<br>Auckland 9, New Zealand                                                                                   | Rob Doughty, MD<br>Andrew Hill, MD<br>Helen Pilmore, MD<br>James Stewart, MD                                 | Martin Tolich<br>Multi-Region Ethics Committee<br>Ministry of Health<br>Level 2, 1-3 The Terrace<br>PO Box 5013<br>Wellington, New Zealand                                              | 1/19/2007         |
| 151*                         | University Hospital Charite                         | Fredrich C. Luft, MD<br>University Hospital Charite<br>Experimental & Clinical Research Center<br>Robert - Rossle Building<br>Lindenbergerweg 80<br>Berlin , Germany 13125     | Ralf Dechend, MD                                                                                             | Prof. Dr. R. Uebelhack<br>University Hospital Charite<br>Ethics Committee at 1 Campus Charite Mitte<br>Schumanstr. 20/21<br>10117 Berlin, Germany                                       | 9/7/2006          |
| 182*                         | Hospital Europeen George Pompidou                   | Marc Sapoval, MD, PhD<br>Hospital Europeen George Pompidou<br>20 rue Leblanc<br>Paris, France                                                                                  | Laurence Amar, MD<br>Pierre-Francois Plouin, MD                                                              | Christophe Misse<br>Care Historique de l'Hospital Saint Louis<br>Secteurgrs Porte 23<br>1 Avenue Claude Vellefaux<br>75475 Paris, France                                                | 1/12/2009         |
| 301*                         | Toronto General/UHN                                 | Dheeraj Rajan, MD<br>Toronto General/UHN<br>University Health Network<br>NCSB-IC 553<br>585 University Ave.<br>Toronto, Ontario Canada M5G 2N2                                 | Ken Sniderman, MD<br>KT Tan, MD<br>Sheldon Tobe, MD                                                          | Ronald Heslegrave<br>700 University Ave<br>Hydro Building 8th Floor South Rm 8.23<br>Toronto, On M5G1Z5                                                                                 | 9/10/2007         |
| 400*                         | Salford Royal Hospital NHS Trust                    | Philip A. Kalra, MD<br>Salford Royal Hospital NHS Trust<br>Stott Lane<br>Salford<br>United Manchester, UK M6 8HD                                                               | Nicholas Chalmers, MD<br>Diana Chiu<br>Darren Green, MD                                                      | Mary Tully<br>Salford Royal Hospital NHS Trust<br>Room 181<br>Gateway House<br>Piccadilly South<br>Manchester, UK M60 7LP                                                               | 5/30/2008         |
| 401*                         | Royal Free Hospital                                 | Jennifer Cross, MD<br>Royal Free Hospital<br>Royal Free Hampstead NHS Trust<br>Rowland Hill St.<br>London, England NW 32PF                                                     | Anthony Goode, MD                                                                                            | Carol Ebenezer<br>Salford Royal Hospital NHS Trust<br>Room 181<br>Gateway House<br>Piccadilly South<br>Manchester, UK M60 7LP                                                           | 10/21/2008        |
| 402*                         | Queen Elizabeth Hospital                            | Graham Lipkin, MD<br>Queen Elizabeth Hospital<br>U Hospital Birmingham NHS Trust<br>Wellcome Trust Clinical Research Facility<br>Edgbaston<br>Birmingham, England B15 2TH      | Charles Ferro, MD                                                                                            | Carol Ebenezer<br>Salford Royal Hospital NHS Trust<br>Room 181<br>Gateway House<br>Piccadilly South<br>Manchester, UK M60 7LP                                                           | 11/6/2008         |
| 403*                         | Manchester Royal Infirmary                          | James Ritchie, MD<br>Manchester Royal Infirmary<br>Oxford Road<br>Manchester, UK M13 9WL                                                                                       | Julian Wright, MD                                                                                            | Carol Ebenezer<br>Salford Royal Hospital NHS Trust<br>Room 181<br>Gateway House<br>Piccadilly South<br>Manchester, UK M60 7LP                                                           | 9/30/2008         |
| 500*                         | University of Cape Town / Groote Schuur Hospital    | Brian Rayner, MD<br>University of Cape Town / Groote Schuur Hospital<br>Department of Medicine<br>Division of Hypertension<br>Observatory 7925<br>Cape Town, South Africa 7925 | Mpiko Ntsekhe, MD<br>Yvonne Trinder, MD                                                                      | Professor M. Blockman<br>University of Cape Town<br>Research Ethics Committee<br>Room E52-24<br>Groote Schuur Hospital Old Main Building<br>Observatory 7925<br>Cape Town, South Africa | 8/7/2007          |

| Site ID | Name                                             | Site Principal Investigator with Address                                                                                                                                           | Site Co-Investigators                                                                                            | Site Institutional Review Board Chairman with Address                                                                                                               | IRB Approval Date |
|---------|--------------------------------------------------|------------------------------------------------------------------------------------------------------------------------------------------------------------------------------------|------------------------------------------------------------------------------------------------------------------|---------------------------------------------------------------------------------------------------------------------------------------------------------------------|-------------------|
| 700*    | Alfred Hospital, Melbourne                       | Ken Thomson, MD<br>Alfred Hospital, Melbourne<br>Department of Radiology<br>1st Floor, WS Philip Block<br>Alfred Hospital<br>Commercial Road<br>Melbourne, Victoria Australia 3004 | William Campbell, MD<br>Stuart Lyon, MD                                                                          | J. McNeil<br>Alfred Ethics Committee<br>The Alfred Hospital<br>Commercial Road<br>Melbourne, Victoria 3004 Australia                                                | 12/7/2006         |
| 701*    | Royal Melbourne Hospital                         | Kathleen Nicholls, MD<br>Royal Melbourne Hospital<br>Grattan Street<br>Parkville, Victoria Australia 3050                                                                          | Richard Dowling, MD<br>Peter Mitchell, MD                                                                        | P.G. Colman<br>Melbourne Health Research Directorate<br>Human Research Ethics Committee<br>Royal Melbourne Hospital<br>Parkville, Victoria 3060 Australia           | 2/12/2007         |
| 704*    | Southern Health                                  | James Burnes, MD<br>Southern Health<br>Monash Medical Centre<br>246 Clayton Road<br>Clayton, Victoria Australia 3168                                                               | Fiona Brown, MD<br>Bruce Jackson, MD<br>Peter Kerr, MD<br>Ken Lau, MD<br>Barry McGrath, MD<br>William Mulley, MD | A/Prof R. MacMahon<br>Human Research Ethics Committee<br>Monash Medical Centre<br>Locked Bag No. 29<br>Clayton, Victoria 3168                                       | 4/30/2007         |
| 709*    | Princess Alexandra Hospital                      | Kendal Redmond, MD<br>Princess Alexandra Hospital<br>Ipswich Road<br>Woolloongabba, QLD Australia                                                                                  | John Harper, MD<br>David Leggett<br>David Mudge, MD                                                              | Jennifer Fleming<br>Princess Alexandra Hospital<br>Human Research and Ethics Committee<br>Ipswich Road<br>Woolloongabba, Brisbane, QLD, Australia<br>4102           | 9/27/2007         |
| 750*    | Gold Coast Hospital                              | Balaji Hiremagalur, MD<br>Gold Coast Hospital<br>108 Nerang Road<br>Southport, QLD Australia 4216                                                                                  | Rohan Jayasinghe, MD<br>Thomas Snow, MD                                                                          | Brian Bell<br>108 Nerang Street<br>Southport, QLD 4215                                                                                                              | 8/29/2007         |
| 901*    | Hospital Italiano de Buenos Aires                | Carlos Matas, MD<br>Hospital Italiano de Buenos Aires<br>Gascon 450 (1181)<br>Buenos Aires, Argentina                                                                              | Carla Agatiello, MD<br>Carlos Borrego, MD<br>Paula Cuffaro, MD<br>Liliana Grinfeld, MD<br>Gabriel Waisman, MD    | Norma Caffaro de Hernandez<br>Comite de Etica de Protocolos de Investigacion<br>Hospital Italiano de Buenos Aires<br>Gascon 450<br>Buenos Aires, Argentina C1181ACH | 3/8/2007          |
| 902*    | Hospital Espanol de La Plata                     | Jose Parmisano, MD<br>Hospital Espanol de La Plata<br>Calle 9 entre 35 y 36<br>1900 La Plata PCIA-BSAS<br>Buenos Aires, Argentina                                                  | Diego D. Grinfeld, MD<br>Pablo Pollono, MD<br>Daniel Sagastizabal, MD<br>Roberto Torrijos, MD                    | Pedro Belloni<br>Hospital Espanol<br>Calle 9N 175<br>La Plata, Argentina B1902COI                                                                                   | 3/15/2007         |
| 903*    | Hospital Privado - Centro Medico de Cordoba S.A. | Marcos Amuchastegui, MD<br>Hospital Privado - Centro Medico de Cordoba S.A.<br>Nacioned Unidas 346 (5016)<br>Cordoba-Pcia de Cordoba, Argentina                                    | Miguel Ballarino, MD<br>Irene DelCorro, MD                                                                       | Gerardo Amuchastegui<br>Hospital Privado<br>Av. Naciones Unidas 346<br>B parque Velez Sarsfield<br>Cordoba, Argentina X5016KEH                                      | 5/11/2007         |
| 904*    | Instituto de Cardiologia de Corrientes           | Jorge Baccaro, MD<br>Instituto de Cardiologia de Corrientes<br>Bolivar 1334 (3400)<br>Pcia.De Corrientes, Argentina                                                                | Eduardo Farias, MD<br>Pablo Liva, MD                                                                             | Joaquin Garcia<br>Comite de Docencia e Investigacion<br>Instituto de Cardiologia "Juana.F.Cabral"<br>Bolivar 1334-3400<br>Corrientes, Argentina W3400AMZ            | 4/4/2007          |
